# Supplementary material
Source: Springer Nature journal article supplement (https://www.springermedizin.de/resource/supplementary/12981_2007_70_MOESM1_ESM.pdf/9603792)
Supplement: MOESM1 [file 9603792]

# Time after TI (months)

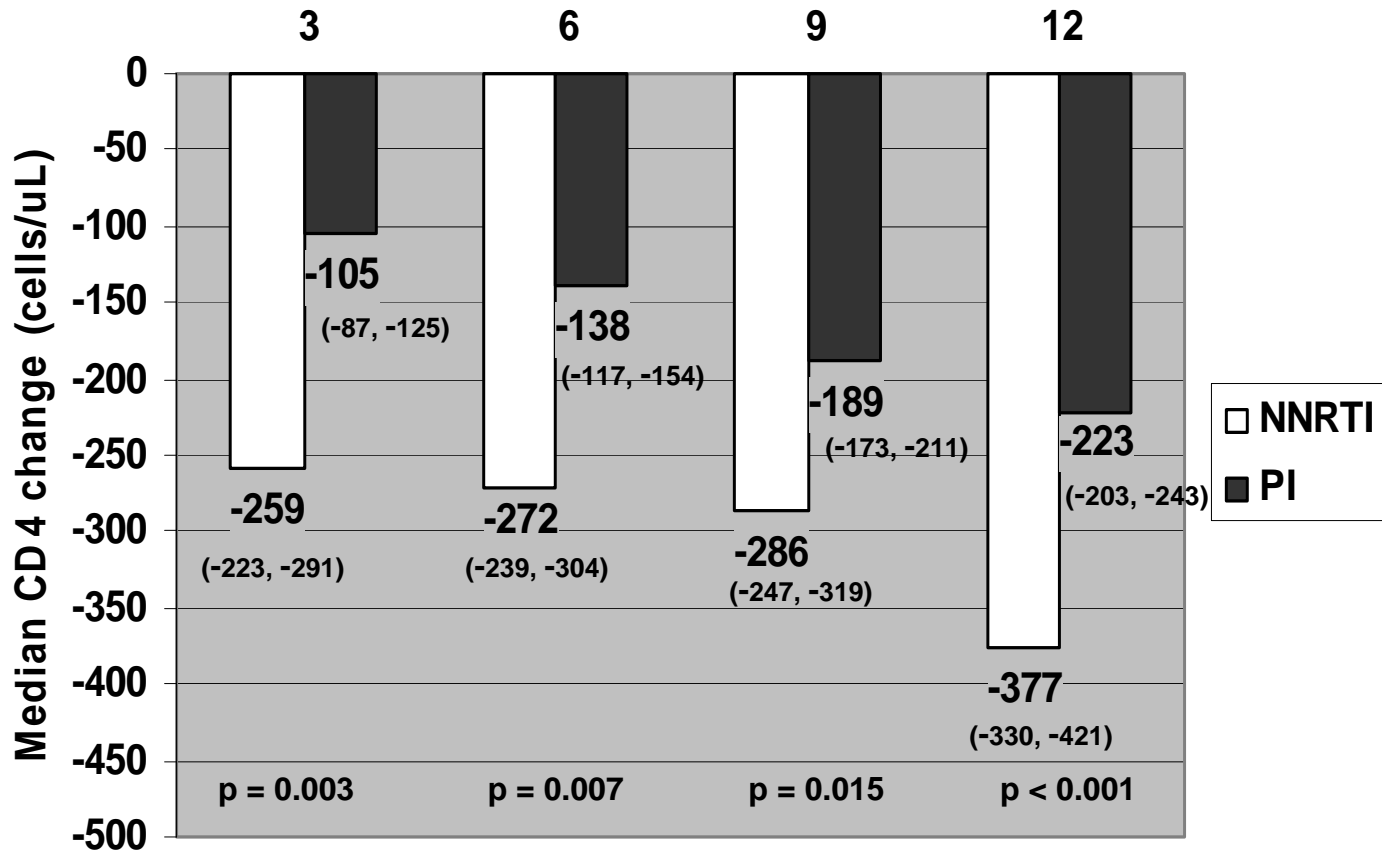

| Number of patients | 3 months | 6 months | 9 months | 12 months |
|--------------------|----------|----------|----------|-----------|
| NNRTI group        | 85       | 68       | 63       | 42        |
| PI group           | 14       | 12       | 10       | 10        |

\*numbers in the parenthesis are interquartile ranges
